# Supplementary material for: Differential Role of Type 2 Diabetes as a Risk Factor for Tuberculosis in the Elderly versus Younger Adults
Source: MDPI journal article supplement (doi:10.3390/pathogens11121551), 2022-12-16
Supplement: s1 [file s1]

Table S1. P values for associations between TB status and each of the host factors shown in Table 1, by age group \*

|                                             | All<br>(≥ 18 y/o)<br>p value | YA<br>(18-44<br>y/o)<br>p value | MAA<br>(45-64<br>y/o)<br>p value | ELD<br>(≥ 65 y/o)<br>p value |
|---------------------------------------------|------------------------------|---------------------------------|----------------------------------|------------------------------|
| <b>Sociodemographics</b>                    |                              |                                 |                                  |                              |
| Male sex                                    | <0.001                       | <0.001                          | <0.001                           | <0.001                       |
| Education, High school or higher            | <0.001                       | <0.001                          | 0.518                            | 0.562                        |
| Current or past smoker                      | <0.001                       | <0.001                          | 0.007                            | 0.036                        |
| <b>TB-related variables</b>                 |                              |                                 |                                  |                              |
| Recent TB exposure (ReC vs CoC)             |                              |                                 |                                  |                              |
| Past TB                                     | <0.001                       | 0.008                           | 0.162                            | 0.027                        |
| BCG                                         | <0.001                       | 0.078                           | 0.295                            | 0.002                        |
| <b>Type 2 diabetes and other conditions</b> |                              |                                 |                                  |                              |
| Type 2 diabetes                             | <0.001                       | <0.001                          | <0.001                           | 0.321                        |
| Overweight/obese, BMI ≥ 25                  | <0.001                       | <0.001                          | <0.001                           | <0.001                       |
| Central obesity (M ≥ 0.90 M; F ≥ 0.86)      | <0.001                       | <0.001                          | 0.001                            | 0.313                        |
| High cholesterol (200 mg/dL)                | <0.001                       | 0.069                           | <0.001                           | <0.001                       |
| High LDL (100 mg/dL)                        | <0.001                       | 0.001                           | <0.001                           | <0.001                       |
| Low HDL (40 M, 50 F, mg/dL)                 | 0.607                        | 0.866                           | 0.266                            | 0.748                        |
| High Triglycerides (150 mg/dL)              | <0.001                       | <0.001                          | <0.001                           | <0.001                       |
| Macrovascular diseases                      | 0.234                        | 0.282                           | 0.052                            | 0.014                        |
| Microvascular diseases                      | <0.001                       | 0.008                           | <0.001                           | 0.356                        |
| Anti-inflammatory medications               | 0.001                        | 0.001                           | 0.131                            | 0.823                        |

\* Data from Table 1 was used to identify associations between host characteristics and TB status among all participants or by age group. Analysis was done by chi-square or Fisher's exact;  $p \leq 0.099$  shown in bold; Normal range values shown in parenthesis; M, males; F, females.

**Table S2. Multivariable logistic regression models for the association between diabetes (exposure) and TB (outcome) by age group \***

|                                                                                                                                                                                                                                                                                                                                                                                                                                                                                 | All<br>(≥ 18 y/o)   | YA<br>(18-44 y/o)    | MAA<br>(45-64 y/o) | ELD<br>(≥ 65 y/o)   |
|---------------------------------------------------------------------------------------------------------------------------------------------------------------------------------------------------------------------------------------------------------------------------------------------------------------------------------------------------------------------------------------------------------------------------------------------------------------------------------|---------------------|----------------------|--------------------|---------------------|
| <b>Models controlling for core variables associated with TB outcomes in all age groups as shown in Table S1</b>                                                                                                                                                                                                                                                                                                                                                                 |                     |                      |                    |                     |
| <b>Diabetes (vs no diabetes)</b>                                                                                                                                                                                                                                                                                                                                                                                                                                                | 4.12 (2.86, 5.93)   | 6.48 (3.35, 12.53)   | 5.4 (2.95, 9.89)   | 1.87 (0.75, 10.95)  |
| <b>Male sex (vs female)</b>                                                                                                                                                                                                                                                                                                                                                                                                                                                     | 3.4 (2.34, 4.94)    | 2.79 (1.58, 4.91)    | 4.34 (2.37, 7.92)  | 4.03 (1.48, 46.78)  |
| <b>BMI, (UW/NOR vs OW/OB)</b>                                                                                                                                                                                                                                                                                                                                                                                                                                                   | 12.03 (8.31, 17.42) | 18.97 (10.28, 35.01) | 7.82 (4.38, 13.95) | 16.22 (5.63, 4.14)  |
| <b>Current or past smoker (vs never)</b>                                                                                                                                                                                                                                                                                                                                                                                                                                        | 1.51 (1.03, 2.22)   | 1.1 (0.61, 2)        | 2.05 (1.13, 3.74)  | 1.46 (0.52, 0)      |
| <b>Sensitivity analysis. Models controlling for variables associated with TB depending on the age group, as shown in Table S1</b>                                                                                                                                                                                                                                                                                                                                               |                     |                      |                    |                     |
| <b>Diabetes (vs no diabetes)</b>                                                                                                                                                                                                                                                                                                                                                                                                                                                | 3.64 (2.51, 5.29)   | 5.3 (2.65, 10.62)    | 5.19 (2.79, 9.67)  | 1.81 (0.72, 43.09)  |
| <b>Male sex (vs female)</b>                                                                                                                                                                                                                                                                                                                                                                                                                                                     | 3.47 (2.36, 5.1)    | 2.73 (1.51, 4.96)    | 4.65 (2.47, 8.75)  | 3.78 (1.38, 45.81)  |
| <b>BMI, (UW/NOR vs OW/OB)</b>                                                                                                                                                                                                                                                                                                                                                                                                                                                   | 12.04 (8.24, 17.59) | 19.46 (10.37, 36.53) | 7.82 (4.29, 14.26) | 14.78 (5.07, 10.34) |
| <b>Current or past smoker (vs never)</b>                                                                                                                                                                                                                                                                                                                                                                                                                                        | 1.51 (1.02, 2.24)   | 1.07 (0.57, 2.01)    | 2.16 (1.17, 3.98)  | 1.46 (0.52, 43.09)  |
| <b>Lower education (vs HS or higher)</b>                                                                                                                                                                                                                                                                                                                                                                                                                                        | 1.52 (1.03, 2.23)   | 1.96 (1.13, 3.4)     | 1.48 (0.77, 2.85)  | NT                  |
| <b>BCG at birth (vs none)</b>                                                                                                                                                                                                                                                                                                                                                                                                                                                   | NT                  | NT                   | NT                 | 0.56 (0.19, 45.81)  |
| <b>Pain/NSAID use (vs none)</b>                                                                                                                                                                                                                                                                                                                                                                                                                                                 | 1.94 (1.29, 2.9)    | 3.05 (1.59, 5.84)    | 1.69 (0.88, 3.27)  | NT                  |
| * Data expressed as adjusted odds ratio (95% CI) after controlling for the variables analyzed for each model; BMI, body-weight index; UW/NOR, underweight or normal weight; OW/OB, overweight or obese; Pain/NSAID, report use of pain medication, including non-steroidal anti-inflammatory drug (NSAID) use in past month; NT, variable not entered into the model because p value above 0.100 by univariable analysis in the corresponding age group; HS, High school degree |                     |                      |                    |                     |

**Table S3. Unique characteristics of diabetes patients without TB for laboratory data, by age groups**

|                                         | All (≥ 18 y/o) |                     | YA (18-44 y/o) |                     | MAA (45-64 y/o) |                     | ELD (≥ 65 y/o) |                     |                  |
|-----------------------------------------|----------------|---------------------|----------------|---------------------|-----------------|---------------------|----------------|---------------------|------------------|
|                                         | n=241          |                     | n=60           |                     | n=134           |                     | n=47           |                     |                  |
| <b>Lipids (mg/dL)</b>                   | <b>n</b>       | <b>%</b>            | <b>n</b>       | <b>%</b>            | <b>n</b>        | <b>%</b>            | <b>n</b>       | <b>%</b>            | <b>p value</b>   |
| High cholesterol (200)                  | 68             | 28.2%               | 16             | 26.7%               | 40              | 29.9%               | 12             | 25.5%               | 0.822            |
| Low HDL (40 M, 50 F)                    | 179            | 74.3%               | 49             | 81.7%               | 97              | 72.4%               | 33             | 70.2%               | 0.306            |
| High LDL (100)                          | 126            | 52.3%               | 28             | 46.7%               | 76              | 56.7%               | 22             | 46.8%               | 0.459            |
| High Triglycerides (150)                | 110            | 45.6%               | 27             | 45.0%               | 65              | 48.5%               | 18             | 38.3%               | 0.478            |
| <b>Complete Blood Counts (x10e3/μL)</b> | <b>n</b>       | <b>median (IQR)</b> | <b>n</b>       | <b>median (IQR)</b> | <b>n</b>        | <b>median (IQR)</b> | <b>n</b>       | <b>median (IQR)</b> | <b>p value</b>   |
| Platelets (146-388)                     | 203            | 252 (95.00)         | 49             | <b>253 (101.00)</b> | 111             | <b>264 (85.00)</b>  | 43             | 217 (71.00)         | <b>&lt;0.001</b> |
| Eosinophils (0.0-0.4)                   | 213            | 0.17 (0.17)         | 50             | 0.18 (0.21)         | 119             | <b>0.16 (0.14)</b>  | 44             | 0.21 (0.24)         | <b>0.087</b>     |
| Lymphocytes (0.8-3.3)                   | 213            | 2.13 (0.86)         | 50             | 2.17 (0.92)         | 119             | 2.15 (0.87)         | 44             | 2.03 (0.72)         | 0.380            |
| Monocytes (0.2-1.0)                     | 213            | 0.45 (0.17)         | 50             | 0.46 (0.15)         | 119             | 0.45 (0.18)         | 44             | 0.45 (0.22)         | 0.799            |
| Neutrophils (2.3-7.7)                   | 213            | 4.29 (1.90)         | 50             | <b>4.66 (1.76)</b>  | 119             | <b>4.28 (1.76)</b>  | 44             | 3.93 (1.73)         | <b>0.026</b>     |
| White blood cells (4.8-10.9)            | 213            | 7.20 (2.40)         | 50             | <b>7.55 (3.40)</b>  | 119             | <b>7.30 (2.00)</b>  | 44             | 6.65 (2.40)         | <b>0.050</b>     |
| Hemoglobin (11.6-15.9 mg/dL)            | 204            | 13.70 (1.70)        | 49             | <b>13.90 (1.80)</b> | 111             | <b>13.70 (1.60)</b> | 44             | 13.20 (2.00)        | <b>0.005</b>     |
| <b>Oxidation status and Vitamin D</b>   | <b>n</b>       | <b>median (IQR)</b> | <b>n</b>       | <b>median (IQR)</b> | <b>n</b>        | <b>median (IQR)</b> | <b>n</b>       | <b>median (IQR)</b> | <b>p value</b>   |
| Reduced:oxidized glutathione ratio      | 97             | 0.58 (0.10)         | 21             | 0.58 (0.09)         | 45              | 0.58 (0.14)         | 31             | 0.60 (0.09)         | 0.752            |
| Vitamin D levels (ng/mL)                | 98             | 26.09 (11.14)       | 18             | 24.59 (8.80)        | 53              | 24.59 (10.29)       | 27             | 29.09 (13.58)       | 0.333            |

Data expressed as column % for categorical variables or median (interquartile range, IQR) for continuous; Normal range values for each parameter shown in parenthesis; M, males; F, Females; p values ≤ 0.099 shown in bold; Bold font in young or middle age adults indicates significant or borderline significant differences when compared to elderly group. YA, young adults; MAA, middle age adults; ELD, elderly.



Table S4. Extended analysis of data from Table 2: Crude and adjusted p values for host characteristics associated with the ELD age group, in T2D-No TB participants

|                                                                      | YA vs ELD | MAA vs ELD | YA vs ELD        | MAA vs ELD | YA vs ELD          | MAA vs ELD |
|----------------------------------------------------------------------|-----------|------------|------------------|------------|--------------------|------------|
|                                                                      | Crude p   |            | Adj p (Sex, SFU) |            | Adj p (Sex, NSAID) |            |
| <b>Sociodemographics, medications and TB-related characteristics</b> |           |            |                  |            |                    |            |
| Male sex                                                             | 0.047     | 0.732      |                  |            |                    |            |
| Education, High school or higher                                     | <0.001    | 0.002      | <0.001           | 0.197      | <0.001             | 0.186      |
| Current smoker                                                       | 0.161     | 0.659      | 0.449            | 0.386      | 0.327              | 0.431      |
| NSAID use                                                            | 0.018     | 0.394      | 0.038            | 0.477      |                    |            |
| BCG vaccination                                                      | 0.594     | 0.616      | 0.549            | 0.825      | 0.927              | 0.481      |
| Latent TB infection                                                  | 0.671     | 0.828      | 0.487            | 0.489      | 0.697              | 0.732      |
| <b>Diabetes history</b>                                              |           |            |                  |            |                    |            |
| Family history of diabetes                                           | 0.064     | 0.115      | 0.059            | 0.645      | 0.253              | 0.419      |
| Self-reported diabetes                                               | 0.261     | 0.951      | 0.784            | 0.516      | 0.569              | 0.549      |
| Years with diabetes, yrs                                             | 0.001     | 0.021      | 0.001            | 0.002      | 0.001              | 0.002      |
| <b>Glucose management</b>                                            |           |            |                  |            |                    |            |
| Hyperglycemia (125 mg/dL)                                            | 0.014     | 0.041      | 0.114            | 0.329      | 0.192              | 0.426      |
| HbA1c (%)                                                            | 0.037     | 0.131      | 0.002            | 0.020      | 0.010              | 0.058      |
| Glycemic Index (HbA1c*T2Dears)                                       | 0.009     | 0.073      | 0.041            | 0.095      | 0.015              | 0.076      |
| Insulin Levels (mU/L)                                                | 0.158     | 0.339      | 0.741            | 0.187      | 0.413              | 0.325      |
| HOMA-IR (Median, IQR)                                                | 0.002     | 0.002      | 0.001            | 0.004      | 0.001              | 0.005      |
| <b>Diabetes medications in past month</b>                            |           |            |                  |            |                    |            |
| Any                                                                  | 0.052     | 0.793      | 0.702            | 0.364      | 0.213              | 0.369      |
| Insulin                                                              | 0.276     | 0.303      | 0.330            | 0.634      | 0.704              | 0.571      |
| Metformin                                                            | 0.304     | 0.383      | 0.882            | 0.086      | 0.424              | 0.072      |
| Sulfonylureas                                                        | 0.001     | 0.127      |                  |            | 0.007              | 0.481      |
| Metformin + Sulfonylureas                                            | 0.021     | 0.572      |                  |            | 0.056              | 0.241      |
| <b>Diabetes-associated conditions</b>                                |           |            |                  |            |                    |            |
| Body-mass index                                                      | 0.009     | 0.305      | 0.031            | 0.328      | 0.023              | 0.297      |
| Central obesity (M ≥ 0.90 M; F ≥ 0.86)                               | 0.037     | 0.005      | 0.255            | 0.083      | 0.444              | 0.090      |
| Macrovascular diseases                                               | <0.001    | 0.004      | <0.001           | 0.862      | <0.001             | 0.968      |
| Microvascular diseases                                               | 0.218     | 0.231      | 0.770            | 0.491      | 0.208              | 0.823      |

\* Data from Table 2 was used to expand analysis on associations between host characteristics and age groups in T2D-no TB participants. P values calculated by chi-square or Fisher's exact (crude p), multivariable logistic

---

regression (Proc LOGISTIC in SAS; categorical variables) or generalized linear models (proc GENMOD in SAS; continuous variables);  $p \leq 0.099$  shown in bold; Cut-off values shown in parenthesis; M, males; F, females.

---

**Table S5. Extended analysis of data from Table S3: Crude and adjusted p values for laboratory characteristics associated with the ELD age group, in T2D-No TB participants**

|                                                        | YA vs<br>ELD | MAA vs<br>ELD    | YA vs<br>ELD     | MAA vs<br>ELD    | YA vs<br>ELD       | MAA vs<br>ELD    |
|--------------------------------------------------------|--------------|------------------|------------------|------------------|--------------------|------------------|
|                                                        | Crude p      |                  | Adj p (Sex, SFU) |                  | Adj p (Sex, NSAID) |                  |
| <b>Lipids (mg/dL)</b>                                  |              |                  |                  |                  |                    |                  |
| High cholesterol (200)                                 | 0.947        | 0.627            | 0.897            | 0.623            | 0.784              | 0.428            |
| Low HDL (40 M, 50 F)                                   | 0.906        | 0.911            | 0.193            | 0.477            | <b>0.077</b>       | 0.353            |
| High LDL (100)                                         | 0.226        | 0.257            | 0.517            | 0.133            | 0.259              | 0.076            |
| High Triglycerides (150)                               | 0.486        | 0.243            | 0.735            | 0.294            | 0.784              | 0.299            |
| <b>Complete Blood Counts (x10e3/<math>\mu</math>L)</b> |              |                  |                  |                  |                    |                  |
| Platelets (146-388)                                    | <b>0.005</b> | <b>&lt;0.001</b> | <b>0.001</b>     | <b>&lt;0.001</b> | <b>0.001</b>       | <b>&lt;0.001</b> |
| Eosinophils (0.0-0.4)                                  | 0.249        | <b>0.031</b>     | <b>0.064</b>     | <b>0.001</b>     | 0.100              | <b>0.002</b>     |
| Lymphocytes (0.8-3.3)                                  | 0.196        | 0.236            | <b>0.057</b>     | 0.100            | <b>0.045</b>       | <b>0.091</b>     |
| Monocytes (0.2-1.0)                                    | 0.916        | 0.652            | 0.766            | 0.335            | 0.982              | 0.376            |
| Neutrophils (2.3-7.7)                                  | <b>0.010</b> | <b>0.071</b>     | <b>0.007</b>     | <b>0.044</b>     | <b>0.003</b>       | <b>0.038</b>     |
| White blood cells (4.8-10.9)                           | <b>0.022</b> | <b>0.066</b>     | <b>0.016</b>     | 0.086            | <b>0.007</b>       | <b>0.070</b>     |
| Hemoglobin (11.6-15.9 mg/dL)                           | <b>0.003</b> | <b>0.012</b>     | <b>0.003</b>     | <b>0.004</b>     | <b>0.002</b>       | <b>0.003</b>     |
| <b>Oxidation status and Vitamin D levels</b>           |              |                  |                  |                  |                    |                  |
| Reduced to oxidized glutathione ratio                  | 0.830        | 0.450            | NS               | NS               | 0.722              | 0.221            |
| Vitamin D levels (ng/mL)                               | 0.276        | 0.156            | NS               | NS               | 0.431              | 0.335            |

Data from Table S3 was used to expand analysis on associations between host laboratory characteristics and age groups in T2D-no TB participants. P values calculated by chi-square or Fisher's exact (crude p), multivariable logistic regression (Proc LOGISTIC in SAS; categorical variables) or generalized linear models (proc GENMOD in SAS; continuous variables); p  $\leq$  0.099 shown in bold; Cut-off values shown in parenthesis; M, males; F, females.

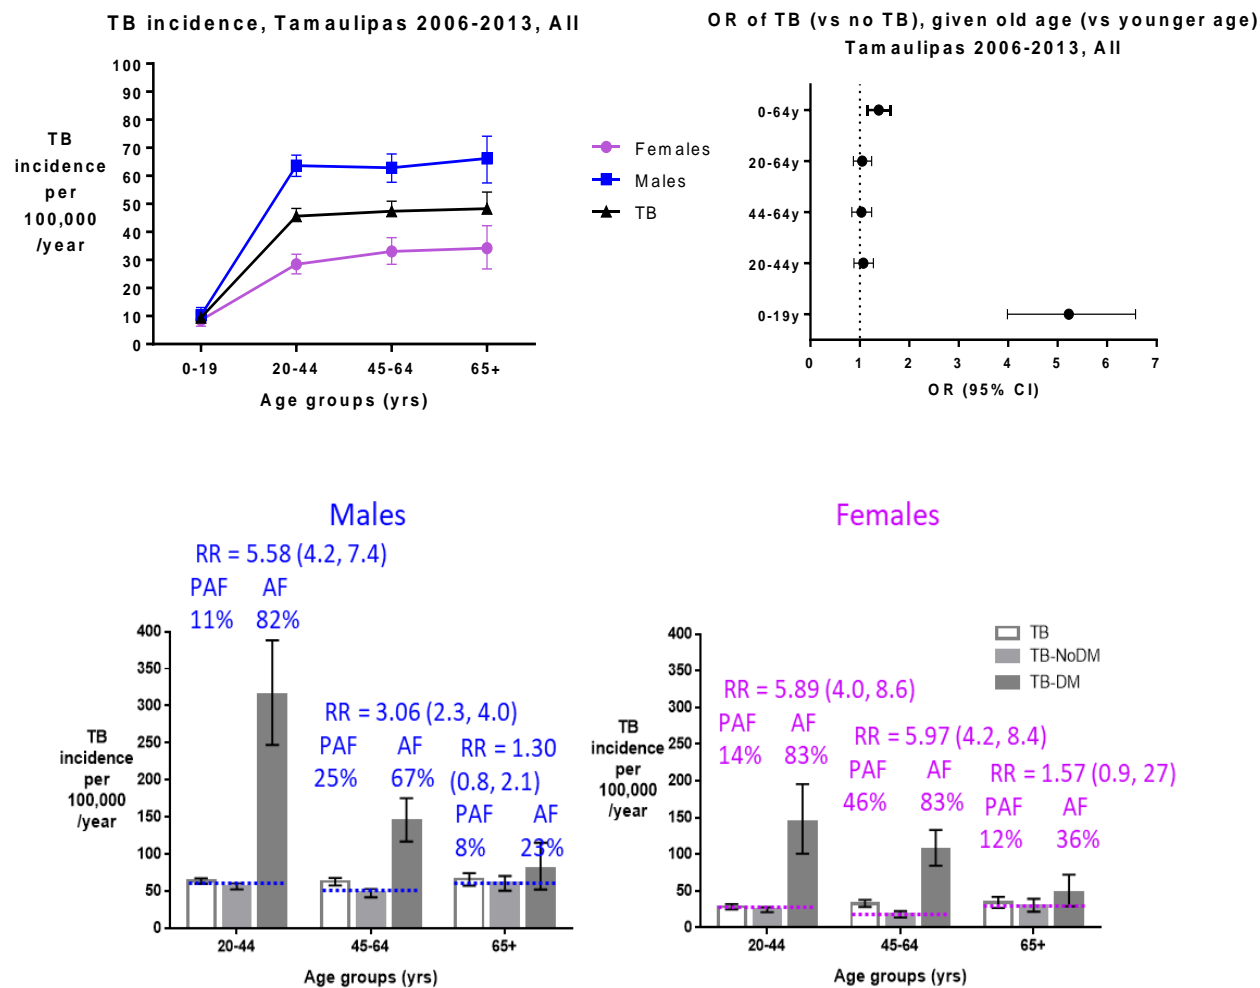

**Figure S1. Sensitivity analysis for results from the validation dataset (Tamaulipas 2006-2013) without removal of participants with HIV, intravenous drug use or excess alcohol. A. Prevalence of TB by sex and age. B. OR of TB vs no TB in the ELD vs: YA (OR 1.06, 95%CI 0.88, 1.27), MAA (OR 1.02, 95%CI 0.84, 1.24), all adults (OR 1.04, 95%CI 0.87, 1.24), or all age groups (OR 1.37, 95%CI 1.48, 1.63). C. Relative risk, attributable fraction and population attributable fraction due to T2D, by sex and age group. Symbols and abbreviations: Dots, point estimates; Error bars, 95% confidence intervals; Horizontal dotted line, reference TB prevalence among individuals without T2D for calculation of T2D attributable fraction and population attributable fraction; RR, relative risk; PAF, T2D population attributable risk fraction for TB; AF, T2D attributable risk fraction for TB. CHILD, 0-19 y/o; YA, 20-44y/o; MAA, 45-64 y/o; ELD, ≥65 y/o.**

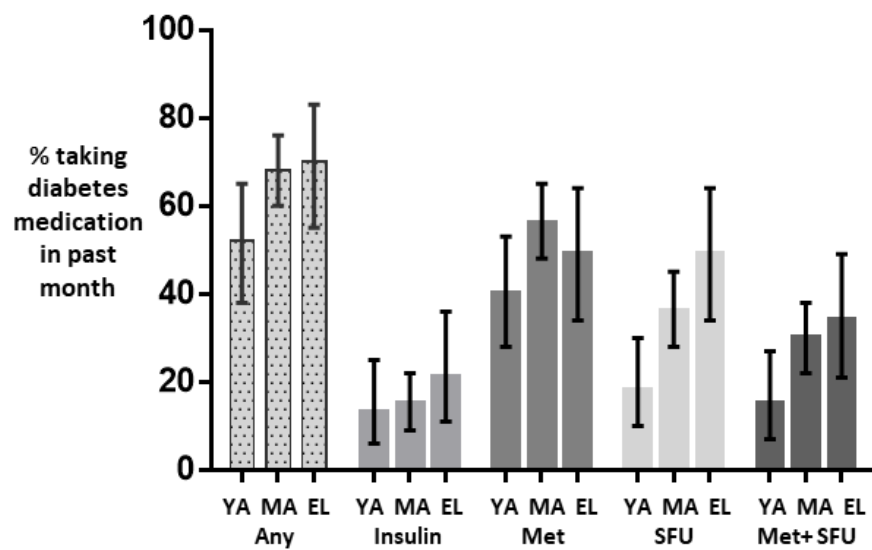

**Figure S2. Proportion of diabetes patients using hypoglycemic agents by age group.** Few participants also reported use of TZDs, SGLT2I, DPPI or GLP-1 agonists (not shown). Vertical bars, 95% CI; SFU, sulphonylureas; Met, metformin
